# Supplementary material for: Continuous Static Gait with Twisting Trunk of a Metamorphic Quadruped Robot
Source: Copernicus journal article supplement (doi:10.5194/ms-9-1-2018), 2018-01-04
Supplement: Supplementary file [file ms-9-1-2018-supplement-title-page.pdf › ms-9-1-2018-supplement-title-page.pdf]

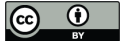

## *Supplement of*

# **Continuous Static Gait with Twisting Trunk of a Metamorphic Quadruped Robot**

**Chunsong Zhang and Jian S. Dai**

*Correspondence to:* Chunsong Zhang (cszhang@tju.edu.cn)

- ms-9-1-2018-supplement-title-page.pdf
- walking on the level terrain.mp4

The copyright of individual parts of the supplement might differ from the CC BY 4.0 License.
